# Supplementary material for: Broadband terahertz signatures and vibrations of dopamine
Source: Royal Society of Chemistry journal article supplement (doi:10.1039/d0an00771d), 2020-01-01
Supplement: d0an00771d1.pdf [file d0an00771d1.pdf]

# Broadband Terahertz Signatures and Vibrations of Dopamine

Zhongjie Zhu<sup>a,b,c</sup>, Jianbing Zhang<sup>a,c</sup>, Yongshun Song<sup>a,d</sup>, Chao Chang<sup>e\*</sup>, Guanhua Ren<sup>a,c</sup>, Jianxiong Shen<sup>a,c,d</sup>, Zongchang Zhang<sup>a,c,d</sup>, Te Ji<sup>a,c</sup>, Min Chen<sup>a,c</sup>, Hongwei Zhao,  
a,c\*

a. Shanghai Institute of Applied Physics, Chinese Academy of Sciences, Shanghai 201800, China

b. University of Chinese Academy of Sciences, Beijing 100049, China

c. Zhangjiang Laboratory, Shanghai Advanced Research Institute, Chinese Academy of Sciences, Shanghai 201210, China

d. East China University of Science and Technology, Shanghai 200237, China

e. Innovation Laboratory of Terahertz Biophysics, National Innovation Institute of Defense Technology, Beijing 100071, China

\* E-mail address: [zhaohongwei@sinap.ac.cn](mailto:zhaohongwei@sinap.ac.cn)

\* E-mail address: [changc@xjtu.edu.cn](mailto:changc@xjtu.edu.cn)

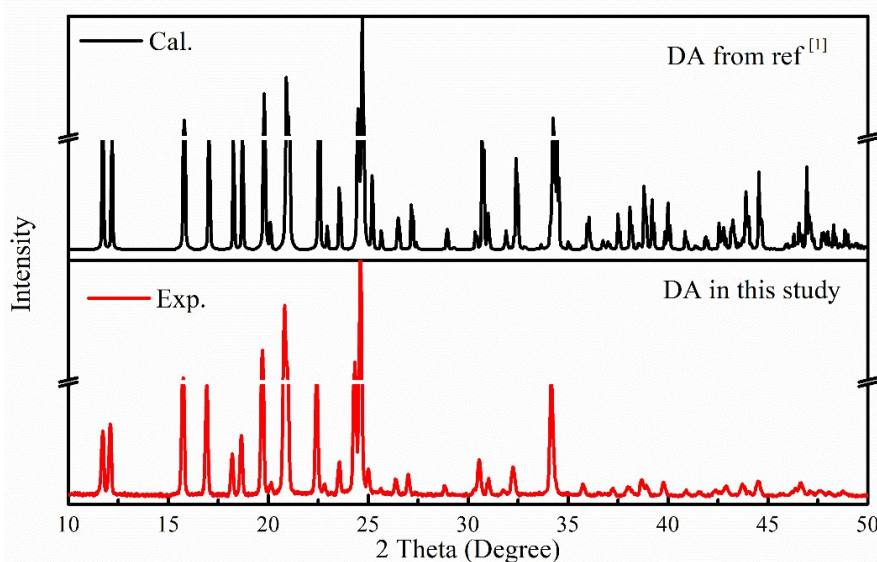

Fig. S1 The experimental and simulated PXRD patterns of DA.

As shown in Fig. S1, PXRD was carried out to check the crystal structure of DA sample. And the result manifests that the experimental PXRD pattern of DA agrees well

with the calculated pattern from the ref<sup>[1]</sup>.

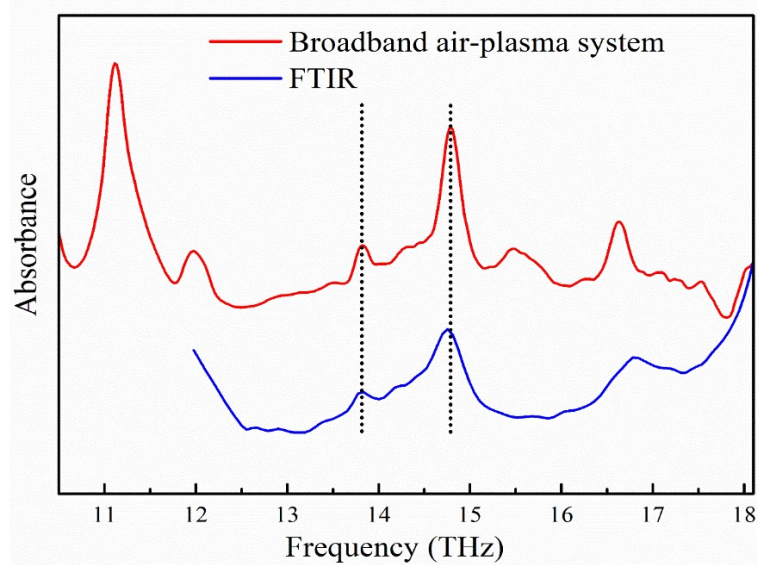

Fig. S2 The comparison of the DA spectra obtained by the broadband air-plasma THz system (red) and FTIR (blue).

Fig. S2 shows the THz spectrum of DA from 10.5 to 18 THz obtained by the broadband air-plasma THz system (COC as substrate) and the FTIR spectrum of DA from 12 to 18 THz (KBr as substrate), the result shows that the COC substrate has obvious absorption in the range of 13 to 16 THz. <sup>[2]</sup>

#### Supporting reference

1. L. Cruickshank, A. R. Kennedy, N. Shankland, *J. Mol. Struct.*, 2013, **1051**, 132-136.
2. Z. J. Zhu, C. Cheng, C. Chang, G. H. Ren, J. B. Zhang, Y. Pen, J. G. Han, H. W. Zhao, *Analyst*, 2019, **144**, 2504-2510.
